# Supplementary material for: A Forward Genetic Screen Identifies Eukaryotic Translation Initiation Factor 3, Subunit H (eIF3h), as an Enhancer of Variegation in the Mouse
Source: PubMed Central journal article supplement (PMC3484669; doi:10.1534/g3.112.004036), 2012-11-01
Supplement: supp_2.11.1393_FigureS1.pdf [file supp_2.11.1393_FigureS1.pdf]

A

| Marker     | Chr 15 location (bp) | Number of Mice |    |   |    |   |
|------------|----------------------|----------------|----|---|----|---|
|            |                      | 168            | 17 | 1 | 14 | 1 |
| rs3251237  | 46091918             |                |    |   |    |   |
| rs31593385 | 51688047             |                |    |   |    |   |
| rs32382338 | 55001176             |                |    |   |    |   |
| D15Mit92   | 71050484             |                |    |   |    |   |

B

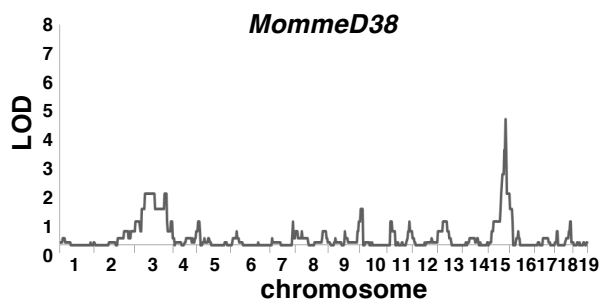

C

| Name            | Chromosome | Location            | Linked interval (Mb) |
|-----------------|------------|---------------------|----------------------|
| <b>MommeD12</b> | 15         | 51688047 - 55001176 | 3.3                  |
| <b>MommeD38</b> | 15         | 45474639 - 67708702 | 22.2                 |

**Figure S1** Linked genetic intervals for *MommeD12* and *MommeD38*

- (A) Linkage data for *MommeD12*. Table showing the SNP or Microsatellite marker, location on chromosome 15 (in base pair) and the number of mice used for mapping. The recombinants in this cross indicate *MommeD12* must lie between rs31593385 and rs32382338. Numbers indicate the number of recombinants at this position. DNA was isolated from G2 tails and a total of 201 tails was used for mapping.
- (B) Manhattan plot showing the linked interval for *MommeD38*. The linked interval was identified by Illumina Golden Gate SNP genotyping analysis. Linkage analysis was performed on twelve wild-type and twelve heterozygous mice using the Mouse Medium Density Linkage panel. This contains 766 measurable SNPs between C57BL/6J and FVB/NJ. Samples were genotyped following the Illumina protocol. Genotype calls were made using the GenomeStudio v1.1 software. Only samples with a call rate >95 were accepted. The x-axis represents the chromosomes and the y-axis is the LOD score. A LOD score of >3 is significant.
- (C) Table showing the chromosome, location on the chromosome and size of the linked intervals in Megabases (Mb) for *MommeD12* and *MommeD38*.
